# Supplementary material for: Apoptosis is Induced in Cancer Cells via the Mitochondrial Pathway by the Novel Xylocydine-Derived Compound JRS-15
Source: Int J Mol Sci. 2013 Jan 4;14(1):850–70. doi: 10.3390/ijms14010850 (PMC3565295; doi:10.3390/ijms14010850)

# Supplementary Information

**Figure S1.** Xylocyidine does not activate the caspases even at a concentration of 75  $\mu$ M of treatment. HeLa cells were treated with 0.15% DMSO (v/v) (Control) or with 75  $\mu$ M xylocyidine for the indicated times. (A–C) Cell-free caspase-3, -8 and -9 activities were measured. (D) Whole-cell lysates were analyzed by immunoblotting for caspase-8, caspase-9, PARP and  $\beta$ -actin.

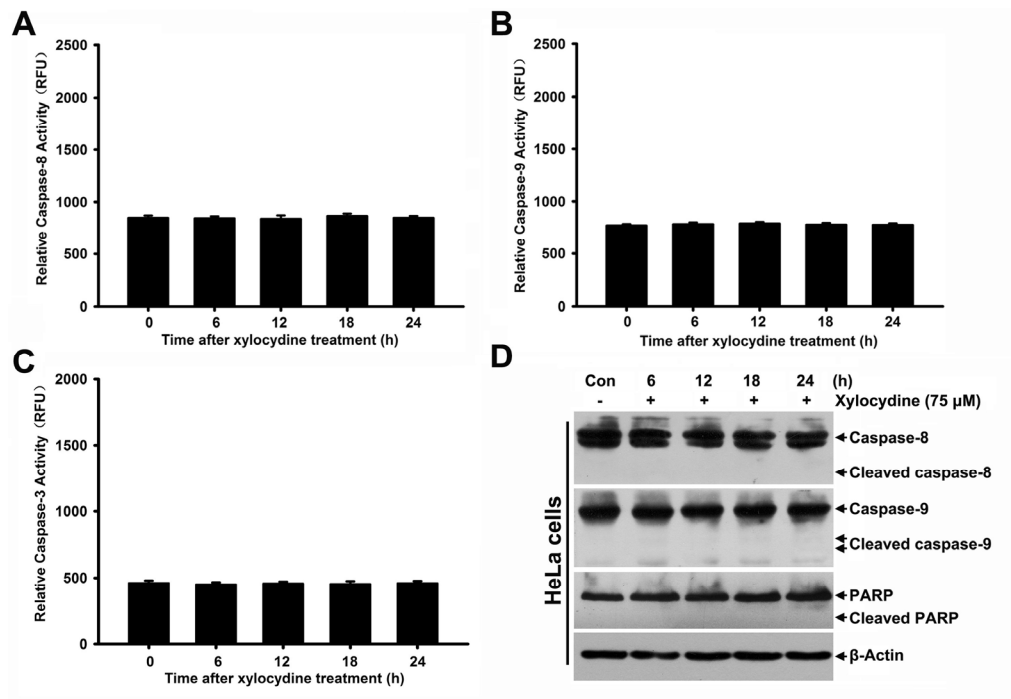

**Figure S2.** JRS-15 does not induce the cleavages of caspases and PARP in LO2 cells at a concentration of 30  $\mu$ M of treatment. LO2 cells were treated with 0.1% DMSO (v/v) (Control) or with 30  $\mu$ M JRS-15 for the indicated times. Whole-cell lysates were analyzed by immunoblotting for caspase-8, caspase-9, PARP and  $\beta$ -actin.

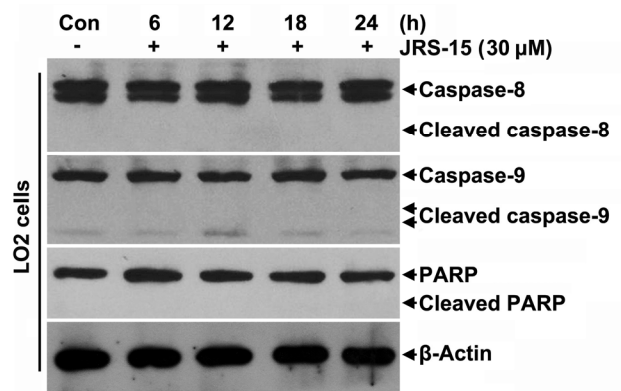

**Figure S3.** JRS-15 cannot inhibit Cdk1 and Cdk2 activity *in vitro*, as well as Cdk7 and Cdk9 activity in cultured HeLa cells. **(A)** The kinase assays were performed at 30 °C for 15 min in the reaction buffer (50 mM Tris-HCl (pH 7.4), 10 mM MgCl<sub>2</sub>, 1 mM EGTA, 50 mM β-glycerophosphate, 0.1 mM Na<sub>3</sub>VO<sub>4</sub>, 25 mM NaF, 2 mM DTT, protease inhibitors and 0.1 mM phenylmethylsulfonyl fluoride) with a final volume of 50 μl that containing 5 μg Histone H1 protein as a specific substrate, Cdk1/cyclin B or Cdk2/cyclin A immunoprecipitated from protein extract of HeLa cells as an enzyme source, 10 μCi of [γ-<sup>32</sup>P]ATP, 15 μM ATP and 10 μM compound. Samples were analyzed by 12% SDS-PAGE followed by autoradiography. The compound of number 15 represents JRS-15, and xylocyidine (xyc.) as a positive control. **(B)** HeLa cells were treated with the indicated concentrations of JRS-15 for 24 h. Whole-cell lysates were analyzed for Cdk7/9-specific phosphorylation of RNA polymerase II-CTD by immunoblotting, β-actin as a loading control.

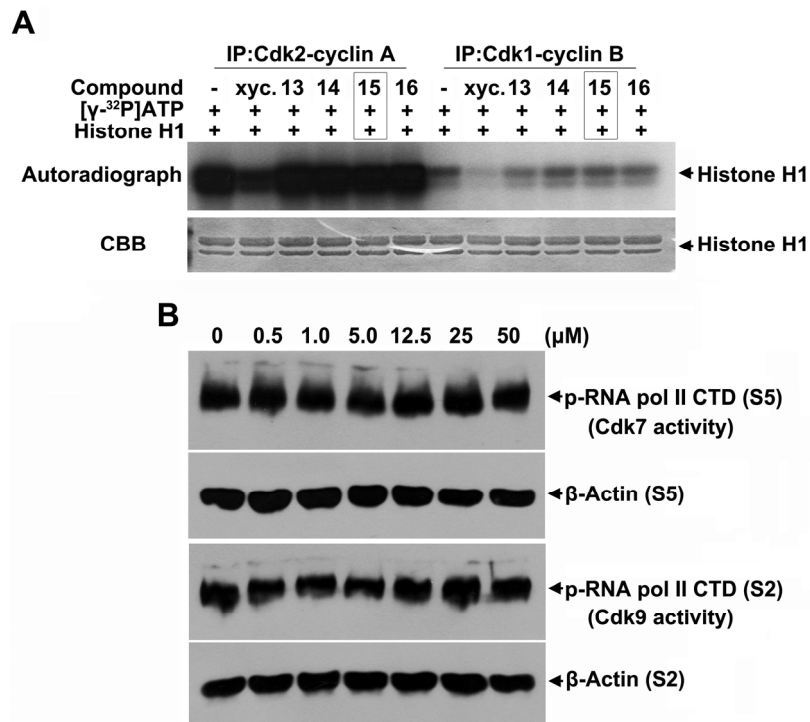

Supplement: Supplementary file 1 [file ijms-14-00850-s001.pdf]
